# Supplementary material for: Riboregulation of the bacterial actin-homolog MreB by DsrA small noncoding RNA
Source: Royal Society of Chemistry journal article supplement (doi:10.1039/c4ib00102h), 2014-11-05

```
CCACTTGATACTAACGTGAAAAATATTCACAAAGATACTCGGTTTAACCTGCGCTTTAATCCGTTTTCACGTAGATA
ATAATGCGCGCTGCGTCTCATGGGAGTGTGCTTGTCTGCTCGCCAGATTGTTGCAGCACATATGCAGATGAATGAC
CTTACGCGGTTGCAAACAGGCGAGGAATGCTGCTGATGCATTAAGCCITTCGGACTCAGGCAGAGATT
TGTAAACAAAGGAAACGAACTGCACTAATTTTACCAGTACAGATGATTTTTGCGCCTTGTCTGCTGCTGC
GTGTGGTTGGTAAAGTAAGCGGATTTTCTTTTCCGCCCCAGCTTTCACGATTATCCCTTAGTATGTTGA
AAAATTTTCGTGGCATGTTTCCAATGACTTGTCCATTGACCTGGGTACTGCGAATACCCTCATTIATG
TAAAAGGACAAGGCATCGTATTGAATGAGCCTTCCGTGCTGGCCATTCGTCAGGATCGTGCCGGTTAC
CGAAAAGCGTAGCTGCAGTAGTTCATGACCGAAGCAGATGCTGGGCCGTACGCCGGGCAATATTGCTG
CCATTCGCCCAATGAAAGACGGCGTTATCGCCGACTTCTTCGTGACTCAAAAAATGCTCCAGCACITCA
TCAAACAAGTGACAGCAACAGCTTTATGCGTCCAAGCCGCGCTTCTGGTTTGTGTGCCGTTGCGC
CGACCCAGGTTGAACGCCGCGCAATTTCGTGAATCCGCGCAGGGCGCTGGTGCCCGTGAAGTCTTCCTGA
TTGAAGAACCGATGGCTGCCGCAATTGGTGTGTCCTGCCGGTTTCTGAAGCGACCGGTTCTATGGTGG
TTGATATCGGTTGGTGGTACCCTGAAGTTGCTGTTATCTCCTTGAACGGTGTGGTTTACTCCTCTCTG
TGCGCATTGGTGGTGACCGTTTCGACGAAGCTATCATCAACTATGTGCGTTCGTAATTACGGTTCTCTGA
TCGGTGAAGCCACCGCAGAACGTATCAAGCACGAAATCGGTTTCGGCTTATCCGGGCGATGAAGTCCGTG
AAATCGAAGTTCGTGGCCGTAACCTGGCAGAAGGTGTCCACGCGGTTTACCCTGAACTCCAATGAAA
TCCTCGAAGCACTGCAGGAACCGCTGACCGGTATTGTGAGCGCGGTAATGGTTGCACTGGAACAGIGCC
CGCCGGAACCTGGCTTCCGACATCTCCGAGCGCGGCATGGTGCTCACCGTGGTGGCGCACTGCTGCGTA
ACCTTGACCGTTTGTAAATGGAAGAAACCGGCATTCCAGTCGTTGTTCTGAAGACCCGCTGACCIGTG
TGCCGCGCGGTTGGCGCAAACCGCTGGAAATGATCGACATGCACGGCGCGACCTGTTTCAGCGAACAG
ATTCGGATGCAGGCAGGGGAAGTGTCTGTTTACCCTGCCTGGTCTGATACGAGAATACGCATAACTTATGAAGCCA
mreE stop AUG mreC
ATTTTTCAGCCGTGGCCCGTCGCTACAGATTCGCCTTATTCTGGCGGTGCTG...
mreC coding sequence
```

Supplementary figure S1: DNA sequence of *mreB* region. The *mreBCD* region is located at ~ 73 min in the *E. coli* chromosome.<sup>1</sup> Three  $\sigma^D$ -dependent promoters contribute to *mreB* transcription ( $P^{mreB_1}$ ,  $P^{mreB_2}$  and  $P^{mreB_3}$ , -10 and -35 boxes) and are indicated as black boxes. Probable transcription initiation sites (-269, -106 and -42) are indicated in bold.<sup>2</sup> Note that -106 initiation site is atypical and could in fact result from a post-transcriptional cleavage by an RNase.<sup>2</sup> Shine Dalgarno (SD) and translation initiation codon of *mreB* are indicated. The region of *mreB* that anneals with DsrA is underlined with a wavy line. The coding sequence of *mreB* is indicated in light grey, whereas the beginning of *mreC* coding sequence appears in dark grey. Stop codon of *mreB* and *yhdA* upstream gene (located nearby  $P^{mreB_3}$ , -35)<sup>3</sup> are italicized.

1. M. Doi, M. Wachi, F. Ishino, S. Tomioka, M. Ito, Y. Sakagami, A. Suzuki and M. Matsushashi, *J Bacteriol*, 1988, 170, 4619-4624.
2. M. Wachi, K. Osaka, T. Kohama, K. Sasaki, I. Ohtsu, N. Iwai, A. Takada and K. Nagai, *Biosci Biotechnol Biochem*, 2006, 70, 2712-2719.
3. N. Sommerfeldt, A. Possling, G. Becker, C. Pesavento, N. Tschowri and R. Hengge, *Microbiology*, 2009, 155, 1318-1331.

**Supplementary figure S2: Influence of DsrA on MreB concentration.** *Left panel:* MreB quantifications were made by Western Blot as described in methods and Fig.1. Two plasmids allowing the expression of DsrA under the control of  $P_{BAD}$  (pNM13 + 0.01% arabinose) and constitutive  $P_{LacO-1}$  (pZE12) promoters were used. Both plasmids resulted in a significant diminution of MreB levels. *Right panel:* an example of Western Blot using a cell extract in the presence (*lane 2*) or not (*lane 1*) of a plasmid that express DsrA (constitutive expression). As shown, anti-MreB antibody is specific.

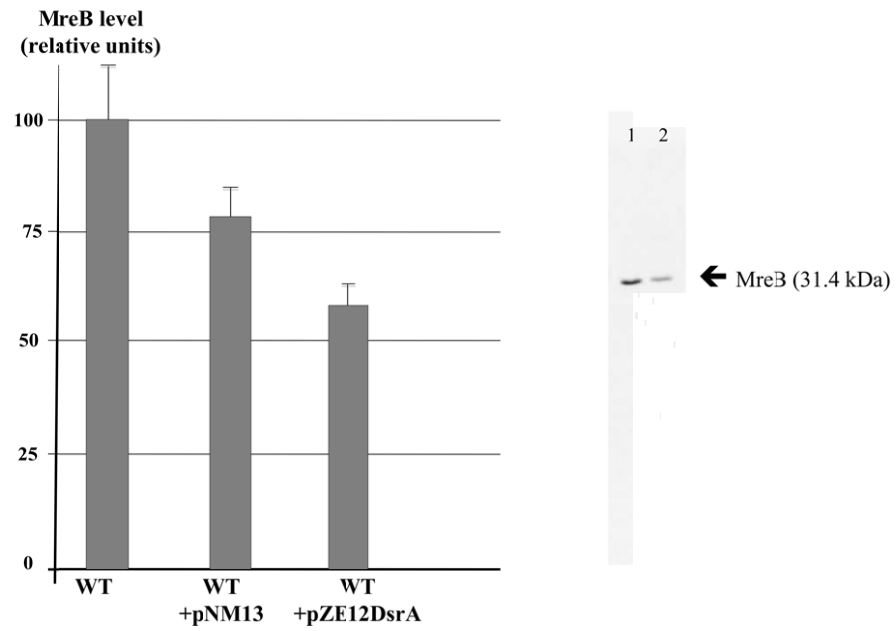

**Supplementary figure S3: DsrA-mediated riboregulation on *mreB-lacZ* translational and transcriptional reporter fusion.**  $\beta$ -galactosidase activities were assayed in cell extracts of the indicated strains grown at 16°C (exponential phase). Drawing is a schematic representation of the *mreB-lacZ* reporter fusion. We observe that DsrA affects *mreB* expression and that DsrA expression from pNM13 (+ 0.001% L-arabinose) in a  $\Delta dsrA$  background complements  $\Delta dsrA$  phenotype, while the empty pNM12 vector does not. Note that the effect observed for  $\Delta dsrA$  strain is slightly less than that seen for the protein level (Fig. 1). Nevertheless, fusion reflects *mreB-lacZ* RNA and MreB-lacZ protein stabilities, which is different from *mreB* mRNA and MreB protein stabilities.

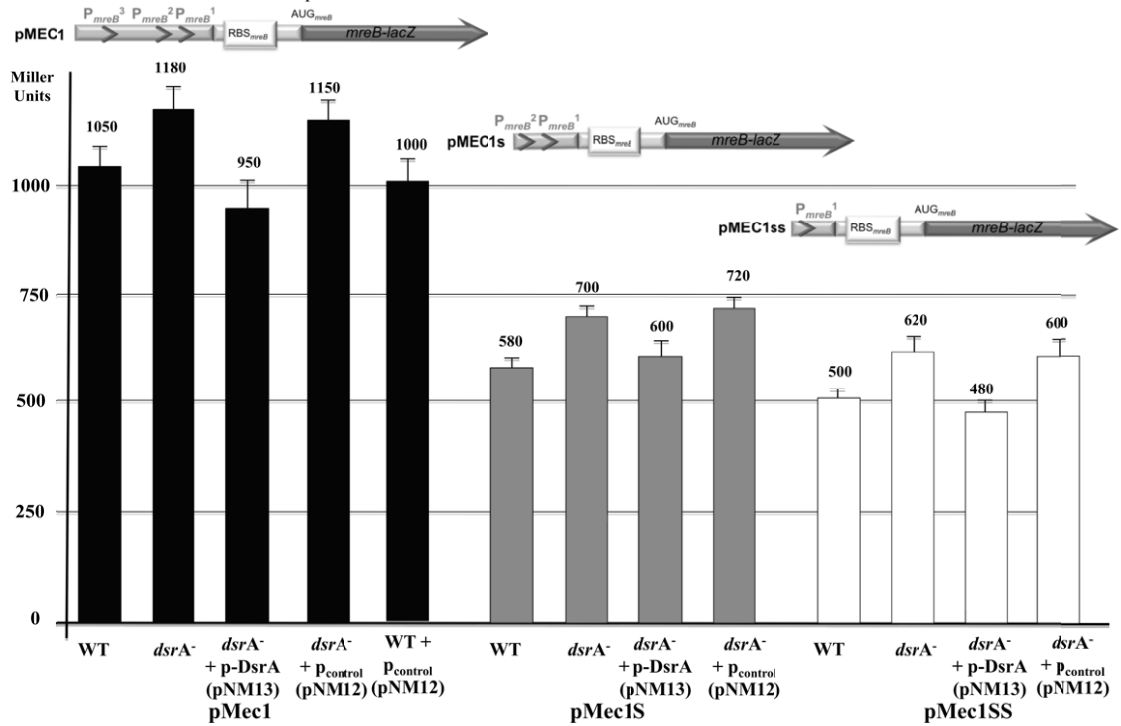

**Supplementary figure S4:** The secondary structure model of *mreB*:DsrA complexes predicted using RNAfold server (<http://rna.tbi.univie.ac.at/cgi-bin/RNAfold.cgi>). The *mreB* AUG start codon is highlighted. Both WT and mutated *mreB* and DsrA pairings are shown.

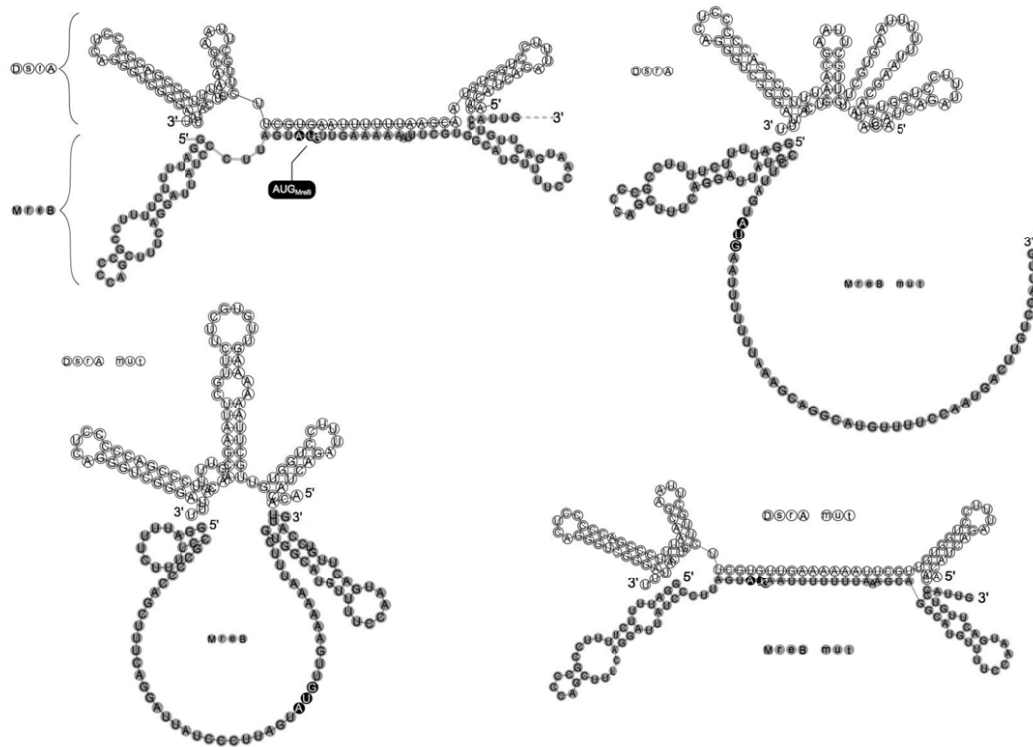

Supplement: c4ib00102h1.pdf [file c4ib00102h1.pdf]
